# Supplementary material
Source: MDPI journal article supplement (https://www.mdpi.com/2071-1050/16/4/1673)
Supplement: s1 [file s1]

# Supplementary Information

## Text S1. Microwave-assisted digestion procedures for determination of total content of heavy metals.

The powdered soil samples (~0.2 g) were digested by a mixture of concentrated HNO<sub>3</sub> (9.0 mL) and 40 % HF (v/v, 3.0 mL) in sealed digestion vessels with a TFM liner and a PFA cap. Microwave-assisted digestion of the soil samples was conducted using a MARS 6 microwave digestion system (CEM, USA), according to method 3052 of the U.S. Environmental Protection Agency (USEPA) (USEPA, 1996). The digestion solutions were evaporated to near dryness on an electric hot plate at 95 °C to remove the excess acids and silicon tetrafluoride (SiF<sub>4</sub>). The residues were re-dissolved with dilute HNO<sub>3</sub> and further diluted to 40 mL using ultrapure water. After filtration by 0.45 µm syringe filters, the concentrations of heavy metal(loid)s (As, Cd, Co, Cr, Cu, Fe, Mn, Ni, Pb, V, and Zn) in the solution samples were determined on a NexION 350D Inductively Coupled Plasma–Mass Spectrometer (ICP-MS, PerkinElmer, USA).

## Tables & Figures

**Table S1. Potential ecological risk levels based on risk factor of a single trace metal.**

| Interval             | Potential ecological risk level |
|----------------------|---------------------------------|
| $E_i < 40$           | Low                             |
| $40 \leq E_i < 80$   | Moderate                        |
| $80 \leq E_i < 160$  | Considerable                    |
| $160 \leq E_i < 320$ | High                            |
| $E_i \geq 320$       | Very high                       |

**Table S2. Potential ecological risk levels based on risk index of multiple trace metals.**

| Interval            | Potential ecological risk level |
|---------------------|---------------------------------|
| $RI < 150$          | Low                             |
| $150 \leq RI < 300$ | Medium                          |
| $300 \leq RI < 600$ | Strong                          |
| $RI \geq 600$       | Extremely strong                |

**Table S3. Exposure parameter used for health risk assessment to toxic elements.**

| Exposed parameter                                   | Unit                    | Adults               | Children             | Reference            |
|-----------------------------------------------------|-------------------------|----------------------|----------------------|----------------------|
| EF: exposure frequency                              | day/year                | 350                  | 350                  | (USEPA, 2011)        |
| ED: exposure years                                  | year                    | 24                   | 6                    | (USEPA, 2011)        |
| AT: average exposure time (non-carcinogenic effect) | day                     | 365×ED               | 365×ED               | (Jiang et al., 2022) |
| AT: average exposure time (carcinogenic effect)     | day                     | 365×70               | 365×15               | (Jiang et al., 2022) |
| BW: body weight                                     | kg                      | 63                   | 29                   | (Liu et al., 2022)   |
| IngR: soil falling rate in ingestion                | mg/day                  | 100                  | 200                  | (USEPA, 2011)        |
| InhR: respiration rate                              | m <sup>3</sup> /day     | 16                   | 7.6                  | (Liu et al., 2022)   |
| SA: exposed skin area                               | cm <sup>2</sup>         | 5700                 | 2800                 | (Liu et al., 2022)   |
| SAF: skin adherence factor for soil                 | mg/cm <sup>2</sup> /day | 0.07                 | 0.2                  | (USEPA, 2011)        |
| ABS: skin adsorption factor                         | -                       | 0.001 (As: 0.03)     |                      | (Liu et al., 2022)   |
| PEF: particle emission factor                       | m <sup>3</sup> /kg      | 1.36×10 <sup>9</sup> | 1.36×10 <sup>9</sup> | (USEPA, 2002)        |
| CF: unit conversion                                 | kg/mg                   | 10 <sup>6</sup>      | 10 <sup>6</sup>      |                      |

**Table S4. Reference dose (RfD, mg/(kg·day)) and slope factor (SF, [mg/(kg·day)]<sup>-1</sup>) of heavy metals through different pathways (Gujre et al., 2021; Liu et al., 2022; Sun et al., 2020).**

|    | RfD <sub>ing</sub>    | RfD <sub>der</sub>    | RfD <sub>inh</sub>    | SF <sub>ing</sub>                                     | SF <sub>der</sub> | SF <sub>inh</sub> |
|----|-----------------------|-----------------------|-----------------------|-------------------------------------------------------|-------------------|-------------------|
| As | 3.00×10 <sup>-4</sup> | 1.23×10 <sup>-4</sup> | 3.00×10 <sup>-4</sup> | 1.50 (Skin cancer),<br>25.7 (Bladder and lung cancer) | 3.66              | 15.1              |
| Cd | 1.00×10 <sup>-3</sup> | 1.00×10 <sup>-5</sup> | 1.00×10 <sup>-3</sup> | -                                                     | -                 | 6.30              |
| Cr | 1.5 <sup>a</sup>      | 6.00×10 <sup>-5</sup> | 2.86×10 <sup>-5</sup> | -                                                     | -                 | -                 |
| Cu | 4.00×10 <sup>-2</sup> | 1.20×10 <sup>-2</sup> | 4.02×10 <sup>-2</sup> | -                                                     | -                 | -                 |
| Ni | 2.00×10 <sup>-2</sup> | 5.40×10 <sup>-3</sup> | 2.06×10 <sup>-2</sup> | -                                                     | -                 | -                 |
| Pb | 3.50×10 <sup>-3</sup> | 5.25×10 <sup>-4</sup> | 3.52×10 <sup>-3</sup> | 8.50×10 <sup>-3</sup>                                 | -                 | -                 |
| Zn | 0.300                 | 6.00×10 <sup>-2</sup> | 0.300                 | -                                                     | -                 | -                 |
| Mn | 4.60×10 <sup>-2</sup> | 1.84×10 <sup>-3</sup> | 5.00×10 <sup>-5</sup> | -                                                     | -                 | -                 |
| Hg | 3.00×10 <sup>-4</sup> | 2.10×10 <sup>-5</sup> | 8.57×10 <sup>-5</sup> | -                                                     | -                 | -                 |

Note:

a - Cr mainly exists in the forms of Cr(III) and Cr(VI), and Cr(VI) will be rapidly reduced to Cr(III) by human gastric juice. Therefore, the RfD value of Cr(III) was chosen to calculate HQ instead of total chromium in the study.

**Table S5.** Variance explained by the extracted components of PCA analysis for trace metals in Yingtan agricultural soil.

| Component | Initial components |                            |                           | Retained components |                            |                           | Rotated components |                            |                           |
|-----------|--------------------|----------------------------|---------------------------|---------------------|----------------------------|---------------------------|--------------------|----------------------------|---------------------------|
|           | Eigen value        | Proportion of variance (%) | Cumulative proportion (%) | Eigen value         | Proportion of variance (%) | Cumulative proportion (%) | Eigen value        | Proportion of variance (%) | Cumulative proportion (%) |
| PC1       | 2.58               | 28.7                       | 28.7                      | 2.58                | 28.7                       | 28.7                      | 2.25               | 25.0                       | 25.0                      |
| PC2       | 1.57               | 17.4                       | 46.1                      | 1.57                | 17.4                       | 46.1                      | 1.69               | 18.8                       | 43.8                      |
| PC3       | 1.18               | 13.1                       | 59.2                      | 1.18                | 13.1                       | 59.2                      | 1.16               | 12.8                       | 56.6                      |
| PC4       | 0.941              | 10.5                       | 69.7                      | 0.941               | 10.4                       | 69.7                      | 1.08               | 12.0                       | 68.6                      |
| PC5       | 0.919              | 10.2                       | 79.9                      | 0.919               | 10.2                       | 79.9                      | 1.02               | 11.3                       | 79.9                      |
| PC6       | 0.736              | 8.18                       | 88.1                      |                     |                            |                           |                    |                            |                           |
| PC7       | 0.514              | 5.71                       | 93.8                      |                     |                            |                           |                    |                            |                           |
| PC8       | 0.374              | 4.16                       | 97.9                      |                     |                            |                           |                    |                            |                           |
| PC9       | 0.185              | 2.06                       | 100                       |                     |                            |                           |                    |                            |                           |

**Table S6.** Source-specific non-carcinogenic risks of heavy metals from different sources.

|                       | Adult                 |                       |                       |                       |                       |                       |                       | Children              |                       |                       |                       |                       |                       |                       |
|-----------------------|-----------------------|-----------------------|-----------------------|-----------------------|-----------------------|-----------------------|-----------------------|-----------------------|-----------------------|-----------------------|-----------------------|-----------------------|-----------------------|-----------------------|
|                       | Factor 1              | Factor 2              | Factor 3              | Factor 4              | Factor 5              | Unknown               | Total                 | Factor 1              | Factor 2              | Factor 3              | Factor 4              | Factor 5              | Unknown               | Total                 |
| Ni                    | $2.70 \times 10^{-4}$ | $1.10 \times 10^{-3}$ | $2.22 \times 10^{-6}$ | $7.97 \times 10^{-5}$ | $7.10 \times 10^{-5}$ | $9.67 \times 10^{-5}$ | $1.62 \times 10^{-3}$ | $1.17 \times 10^{-3}$ | $4.77 \times 10^{-3}$ | $9.59 \times 10^{-6}$ | $3.45 \times 10^{-4}$ | $3.07 \times 10^{-4}$ | $4.18 \times 10^{-4}$ | $7.02 \times 10^{-3}$ |
| Cr                    | $5.89 \times 10^{-4}$ | $4.07 \times 10^{-3}$ | $2.59 \times 10^{-4}$ | $5.50 \times 10^{-4}$ | $5.28 \times 10^{-5}$ | $5.88 \times 10^{-4}$ | $6.11 \times 10^{-3}$ | $1.73 \times 10^{-3}$ | $1.20 \times 10^{-2}$ | $7.64 \times 10^{-4}$ | $1.62 \times 10^{-3}$ | $1.55 \times 10^{-4}$ | $1.73 \times 10^{-3}$ | $1.80 \times 10^{-2}$ |
| Cu                    | $3.65 \times 10^{-4}$ | $2.10 \times 10^{-4}$ | $1.57 \times 10^{-4}$ | $1.38 \times 10^{-4}$ | $1.29 \times 10^{-4}$ | $1.44 \times 10^{-4}$ | $1.14 \times 10^{-3}$ | $3.39 \times 10^{-3}$ | $9.09 \times 10^{-4}$ | $6.81 \times 10^{-4}$ | $5.95 \times 10^{-4}$ | $5.60 \times 10^{-4}$ | $6.22 \times 10^{-4}$ | $6.76 \times 10^{-3}$ |
| Zn                    | $3.03 \times 10^{-4}$ | $1.03 \times 10^{-4}$ | $7.51 \times 10^{-6}$ | $1.61 \times 10^{-5}$ | $7.12 \times 10^{-6}$ | $1.48 \times 10^{-5}$ | $4.51 \times 10^{-4}$ | $1.31 \times 10^{-3}$ | $4.44 \times 10^{-4}$ | $3.24 \times 10^{-5}$ | $6.95 \times 10^{-5}$ | $3.08 \times 10^{-5}$ | $6.38 \times 10^{-5}$ | $1.95 \times 10^{-3}$ |
| As                    | $1.57 \times 10^{-3}$ | $6.68 \times 10^{-3}$ | $3.54 \times 10^{-2}$ | $3.86 \times 10^{-3}$ | $1.13 \times 10^{-2}$ | $2.86 \times 10^{-3}$ | $6.17 \times 10^{-2}$ | $6.35 \times 10^{-3}$ | $2.71 \times 10^{-2}$ | 0.143                 | $1.57 \times 10^{-2}$ | $4.59 \times 10^{-2}$ | $1.16 \times 10^{-2}$ | 0.250                 |
| Pb                    | $1.58 \times 10^{-2}$ | $2.39 \times 10^{-4}$ | $2.80 \times 10^{-4}$ | $1.41 \times 10^{-3}$ | $2.49 \times 10^{-3}$ | $8.49 \times 10^{-4}$ | $2.11 \times 10^{-2}$ | $6.83 \times 10^{-2}$ | $1.03 \times 10^{-3}$ | $1.21 \times 10^{-3}$ | $6.06 \times 10^{-3}$ | $1.07 \times 10^{-2}$ | $3.66 \times 10^{-3}$ | $9.10 \times 10^{-2}$ |
| Cd                    | $5.58 \times 10^{-4}$ | $8.95 \times 10^{-5}$ | $2.38 \times 10^{-5}$ | $2.91 \times 10^{-5}$ | $1.75 \times 10^{-5}$ | $1.04 \times 10^{-4}$ | $8.22 \times 10^{-4}$ | $2.22 \times 10^{-3}$ | $3.56 \times 10^{-4}$ | $9.46 \times 10^{-5}$ | $1.16 \times 10^{-4}$ | $6.96 \times 10^{-5}$ | $4.15 \times 10^{-4}$ | $3.27 \times 10^{-3}$ |
| Mn                    | $1.41 \times 10^{-3}$ | $5.70 \times 10^{-4}$ | $8.79 \times 10^{-5}$ | $3.65 \times 10^{-3}$ | $6.39 \times 10^{-4}$ | $1.08 \times 10^{-3}$ | $7.43 \times 10^{-3}$ | $5.54 \times 10^{-3}$ | $2.25 \times 10^{-3}$ | $3.47 \times 10^{-4}$ | $1.44 \times 10^{-2}$ | $2.52 \times 10^{-3}$ | $4.24 \times 10^{-3}$ | $2.93 \times 10^{-2}$ |
| Hg                    | $4.92 \times 10^{-5}$ | $2.46 \times 10^{-5}$ | $1.47 \times 10^{-5}$ | $2.05 \times 10^{-5}$ | $3.24 \times 10^{-4}$ | $2.33 \times 10^{-5}$ | $4.56 \times 10^{-4}$ | $2.10 \times 10^{-4}$ | $1.05 \times 10^{-4}$ | $6.29 \times 10^{-5}$ | $8.75 \times 10^{-5}$ | $1.38 \times 10^{-3}$ | $9.95 \times 10^{-5}$ | $1.94 \times 10^{-3}$ |
| THI <sub>ing</sub>    | $1.92 \times 10^{-2}$ | $7.39 \times 10^{-3}$ | $2.79 \times 10^{-2}$ | $7.66 \times 10^{-3}$ | $1.22 \times 10^{-2}$ | $4.28 \times 10^{-3}$ | $7.87 \times 10^{-2}$ | $8.52 \times 10^{-2}$ | $3.21 \times 10^{-2}$ | 0.121                 | $3.33 \times 10^{-2}$ | $5.32 \times 10^{-2}$ | $1.86 \times 10^{-2}$ | 0.344                 |
| THI <sub>inh</sub>    | $1.62 \times 10^{-4}$ | $2.87 \times 10^{-4}$ | $2.61 \times 10^{-5}$ | $3.59 \times 10^{-4}$ | $6.17 \times 10^{-5}$ | $1.31 \times 10^{-4}$ | $1.03 \times 10^{-3}$ | $1.67 \times 10^{-4}$ | $2.96 \times 10^{-4}$ | $2.70 \times 10^{-5}$ | $3.71 \times 10^{-4}$ | $6.37 \times 10^{-5}$ | $1.35 \times 10^{-4}$ | $1.06 \times 10^{-3}$ |
| THI <sub>dermal</sub> | $1.61 \times 10^{-3}$ | $5.41 \times 10^{-3}$ | $8.27 \times 10^{-3}$ | $1.74 \times 10^{-3}$ | $2.75 \times 10^{-3}$ | $1.34 \times 10^{-3}$ | $2.11 \times 10^{-2}$ | $4.91 \times 10^{-3}$ | $1.65 \times 10^{-2}$ | $2.52 \times 10^{-2}$ | $5.30 \times 10^{-3}$ | $8.38 \times 10^{-3}$ | $4.09 \times 10^{-3}$ | $6.44 \times 10^{-2}$ |
| THI                   | $2.10 \times 10^{-2}$ | $1.31 \times 10^{-2}$ | $3.62 \times 10^{-2}$ | $9.75 \times 10^{-3}$ | $1.50 \times 10^{-2}$ | $5.75 \times 10^{-3}$ | 0.101                 | $9.02 \times 10^{-2}$ | $4.89 \times 10^{-2}$ | 0.147                 | $3.89 \times 10^{-2}$ | $6.16 \times 10^{-2}$ | $2.28 \times 10^{-2}$ | 0.409                 |

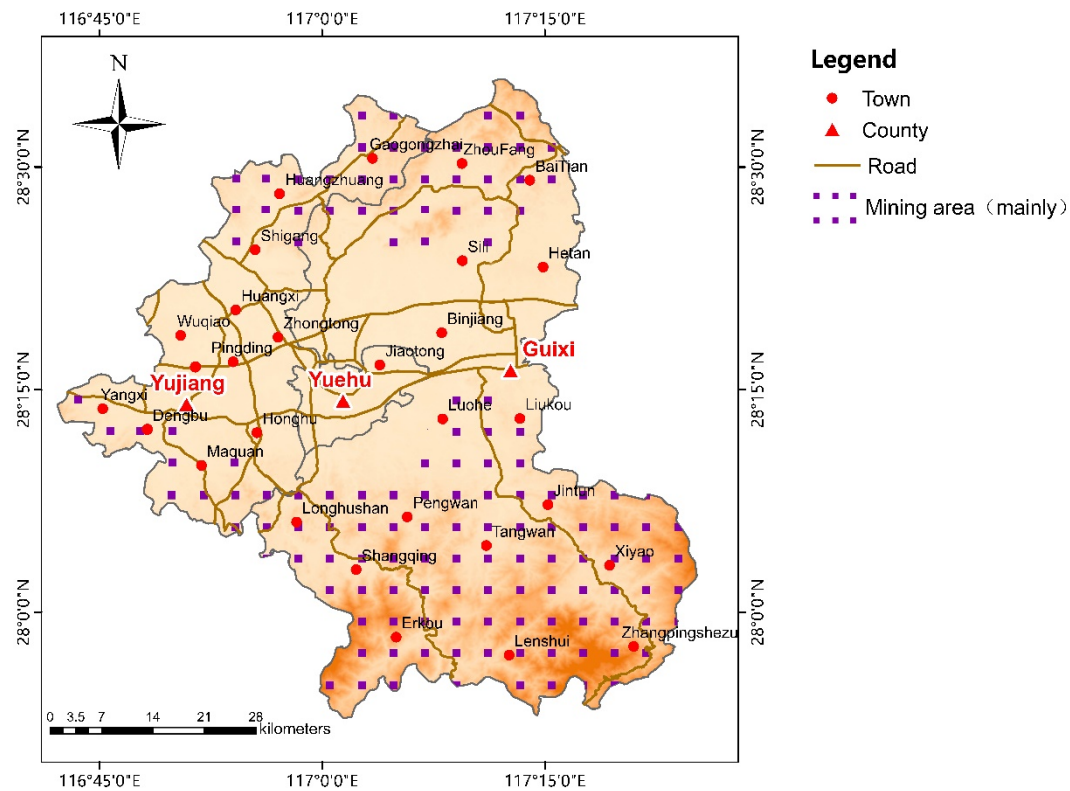

**Figure S1.** Distribution of the main mining areas, residential areas, and roads in Yingtian.

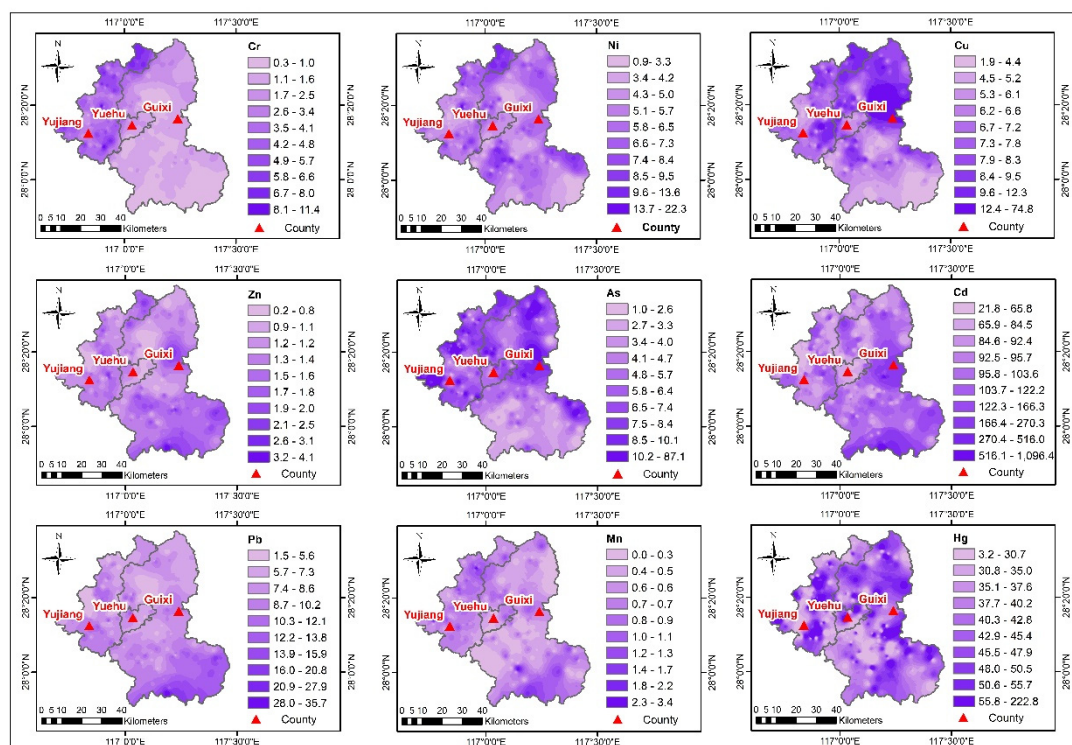

**Figure S2.** Spatial distributions of single risk factors of trace metals in Yingtian agricultural soils.

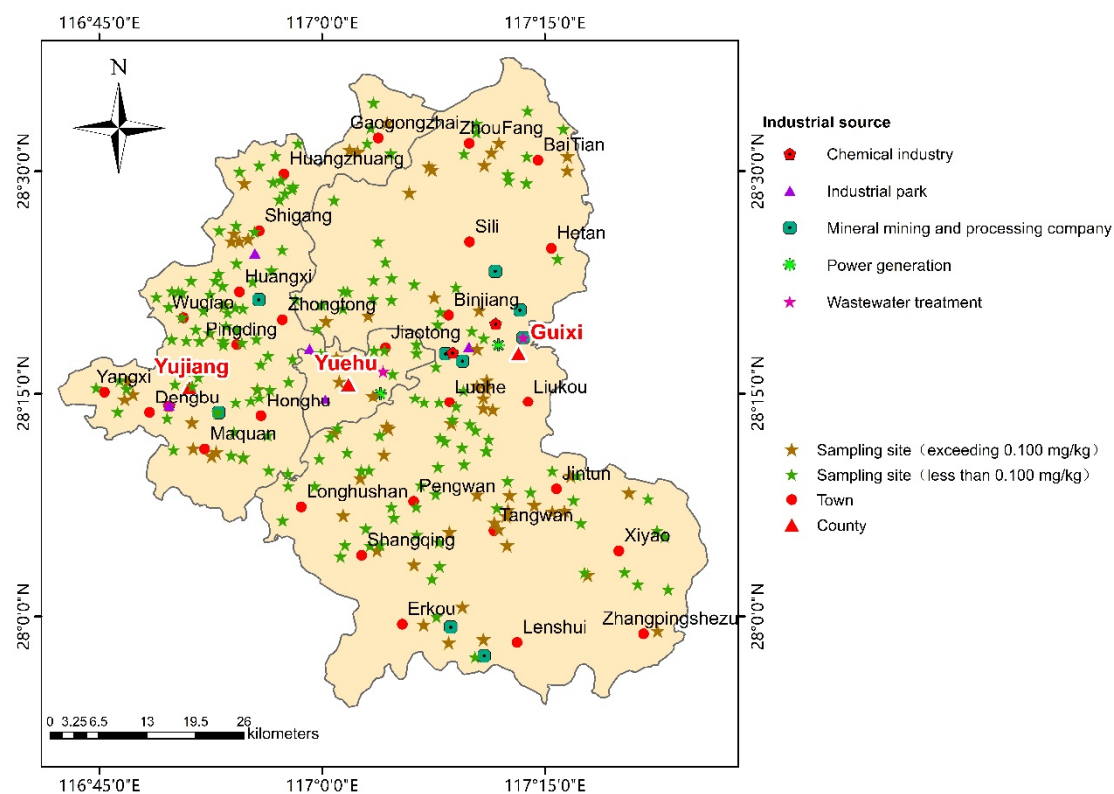

**Figure S3.** Spatial distribution of sampling sites with severe pollution of Hg (the concentration exceeding 0.100 mg/kg).

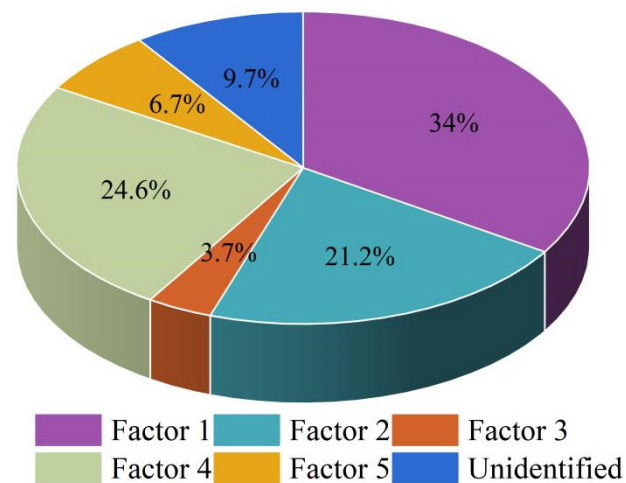

**Figure S4.** The contribution of different sources to the total metal contents.

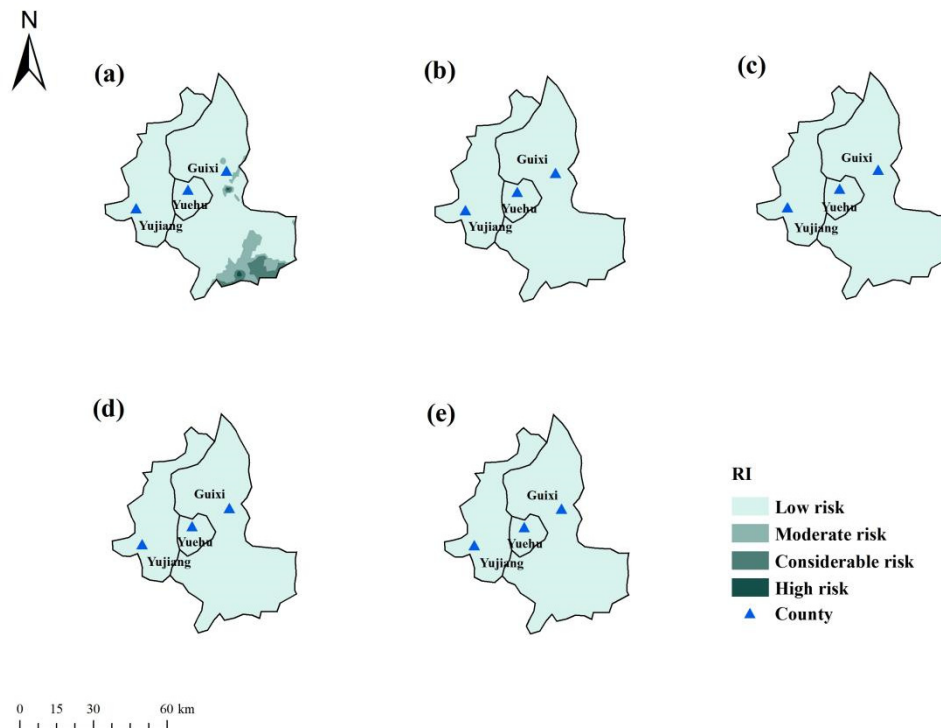

**Figure S5.** The spatial distribution of RI from different sources.

## Reference

- Gujre, N., Mitra, S., Soni, A., Agnihotri, R., Rangan, L., Rene, E.R. and Sharma, M.P. 2021. Speciation, contamination, ecological and human health risks assessment of heavy metals in soils dumped with municipal solid wastes. *Chemosphere* 262, 128013.
- Jiang, Y., Wen, H., Zhang, Q., Yuan, L. and Liu, L. 2022. Source apportionment and health risk assessment of potentially toxic elements in soil from mining areas in northwestern China. *Environ. Geochem. Health*, 1-16.
- Liu, Y.P., Cao, X.D., Hu, Y.A. and Cheng, H.F. 2022. Pollution, Risk and Transfer of Heavy Metals in Soil and Rice: A Case Study in a Typical Industrialized Region in South China. *Sustainability* 14(16), 16.
- Sun, Z.H., Hu, Y.N. and Cheng, H.F. 2020. Public health risk of toxic metal(loid) pollution to the population living near an abandoned small-scale polymetallic mine. *Sci. Total Environ.* 718, 13.
- USEPA, 2002. Risk-based Concentration Table. U.S. Environmental Protection Agency, Washington, DC.
- USEPA, 2011. Exposure Factors Handbook 2011 Edition (Final). U.S. Environmental Protection Agency, Washington, DC.
